# Supplementary material
Source: Elsevier journal article supplement (https://git.physik.uzh.ch/gitbucket/mchrzasz/Lecture_repo/raw/3f54c9e10968366525eb7e27b34ce7f3191cac49/Lectures_others/MC/W_Placzek_2010/mmc11.pdf)
Supplement: mmc11 [file mmc11.pdf]

# Równania całkowe, zagadnienia własne, interpolacja funkcji wielu zmiennych

- Rozwiązywanie równań całkowych metodami błędzenia przypadkowego.
- Zastosowanie metod błędzenia przypadkowego do zagadnień własnych.
- Interpolacja funkcji wielu zmiennych metodą Monte Carlo.

## Równanie całkowe Fredholma drugiego rodzaju

$$\phi(x) = f(x) + \int_a^b K(x, y) \phi(y) dy, \quad (1)$$

gdzie  $f$  i  $K$  – znane funkcje;

$K(x, y)$  – **jądro (kernel) równania całkowego**.

► **Zadanie: Znaleźć funkcję  $\phi$  spełniającą powyższe równanie.**

▷ **Nie ma wydajnych metod klasycznej analizy numerycznej rozwiązywania tego typu równań!**

Warunki jakie muszą spełniać funkcje  $f$  i  $K$ , aby można było stosować określone metody rozwiązywania powyższego równania całkowego są różne dla różnych metod.

▷ **Zawsze będziemy zakładać, że szereg Neumanna dla powyższego równania jest zbieżny.**

► Metody Monte Carlo:

Zbudować model probabilistyczny, którego rozwiązanie jest równoważne rozwiązaniu powyższego równania. → Taki model można zbudować na wiele różnych sposobów.

## Szereg Neumanna dla równia całkowego Fredholma:

Kolejne przybliżenia rozwiązania równania całkowego:

$$\phi_0(x) = 0, \quad \phi_1(x) = f(x) + \int_a^b K(x, y) \phi_0(y) dy = f(x),$$

$$\phi_2(x) = f(x) + \int_a^b K(x, y) \phi_1(y) dy = f(x) + \int_a^b K(x, y) f(y) dy,$$

$$\begin{aligned} \phi_3(x) &= f(x) + \int_a^b K(x, y) \phi_2(y) dy \\ &= f(x) + \int_a^b K(x, y) f(y) dy + \int_a^b \int_a^b K(x, y) K(y, z) f(z) dy dz. \end{aligned}$$

Wprowadzając oznaczenia

$$K^{(1)}(x, y) = K(x, y), \quad K^{(2)}(x, y) = \int_a^b K(x, t) K(t, y)^{(1)} dt$$

otrzymujemy

$$\phi_3(x) = f(x) + \int_a^b K^{(1)}(x, y) f(y) dy + \int_a^b K^{(2)}(x, y) f(y) dy.$$

Kontynuując ten proces, oznaczamy

$$K^{(n)}(x, y) = \int_a^b K(x, t) K^{(n-1)}(t, y) dt,$$

wówczas  $n$ -te przybliżenie rozwiązania równania całkowego ma postać:

$$\begin{aligned} \phi_n(x) = & f(x) + \int_a^b K^{(1)}(x, y) f(y) dy + \int_a^b K^{(2)}(x, y) f(y) dy + \dots \\ & + \int_a^b K^{(n)}(x, y) f(y) dy. \end{aligned}$$

► Przechodząc do granicy  $n \rightarrow \infty$  otrzymujemy **szereg Neumanna**:

$$\phi(x) = \lim_{n \rightarrow \infty} \phi_n(x) = f(x) + \sum_{n=1}^{\infty} \int_a^b K^{(n)}(x, y) f(y) dy.$$

• Szereg Neumanna jest zbieżny absolutnie i jednostajnie na kwadracie  $a \leq x, y \leq b$  dla:

$$\int_a^b \int_a^b |K(x, y)|^2 dx dy < 1.$$

## Metoda E. S. Page'a:

Model błędzenia przypadkowego cząsteczki  $X$  po odcinku  $(a, b)$ :

- W chwili  $t = 0$  cząsteczka  $X$  znajduje się w punkcie  $x_0 = x$ .
  - Jeśli w chwili  $t = n - 1$  cząsteczka znajdowała się w położeniu  $x_{n-1}$ , to w chwili  $t = n$  znajduje się w położeniu  $x_n = x_{n-1} + \xi_n$ , gdzie  $\xi_1, \xi_2, \dots$  są niezależnymi zmiennymi losowymi o rozkładzie danym gęstością  $\rho$ .
  - Cząsteczka ulega **anihilacji**, gdy przekroczy brzeg  $x = a$  lub  $x = b$ .  
**Czas życia** cząsteczki  $X$  wynosi  $n$ , jeżeli  $x_n \leq a$  lub  $x_n \geq b$  oraz  $a < x_t < b$  dla wszystkich  $t = 0, 1, 2, \dots, n - 1$ .
- Oczekiwany czas życia  $\tau(x)$  cząsteczki  $X$ , która w chwili  $t = 0$  znajduje się w punkcie  $x$  spełnia równanie całkowe:

$$\tau(x) = \rho_1(x) + \int_a^b [1 + \tau(y)] \rho(y - x) dy,$$

gdzie

$$\rho_1(x) = \int_{-\infty}^{a-x} \rho(y) dy + \int_{b-x}^{+\infty} \rho(y) dy$$

oznacza prawdopodobieństwo anihilacji cząsteczki w chwili  $t = 1$ .

► Równanie dla  $\tau(x)$  możemy przekształcić do prostszej postaci:

$$\tau(x) = 1 + \int_a^b \tau(y) \rho(y - x) dy. \quad (2)$$

Niech  $p(x)$  oznacza prawdopodobieństwo tego, że cząsteczka, która w chwili  $t = 0$  była w punkcie  $x$ , ulegnie **anihilacji** z powodu przekroczenia granicy  $a$ ,

(tzn.  $x_0 = x$ ,  $a < x_t < b$  dla  $t = 0, 1, \dots, n - 1$ ,  $x_n \leq a$  dla pewnego  $n$ ).

► Prawdopodobieństwo  $p(x)$  spełnia następujące równanie całkowe:

$$p(x) = \varrho(x) + \int_a^b p(y) \rho(y - x) dy, \quad (3)$$

gdzie

$$\varrho(x) = \int_{-\infty}^{a-x} \rho(y) dy$$

jest prawdopodobieństwem anihilacji cząsteczki w pierwszym kroku.

▷ Dla funkcji  $\tau$  oraz  $p$  otrzymaliśmy równania całkowe Fredholma drugiego rodzaju.

⇒ Zatem powyższy schemat błędzenia przypadkowego może być bezpośrednio użyty do szacowania rozwiązania równania całkowego Fredholma w szczególnej postaci (2) lub (3).

## Schemat rozwiązywania ogólnego równania Fredholma w postaci (1):

- Niech  $\rho(x)$  – gęstość prawdopodobieństwa niezależnych zmiennych losowych  $\xi_n$ .
- Obserwujemy błędzenie przypadkowe cząsteczki  $X$  jak w poprzednim schemacie.  
 Niech  $\gamma = (x_0, x_1, x_2, \dots, x_n)$  będzie trajekcją tej cząsteczki, tzn.  $a < x_t < b$  dla  $t = 0, 1, 2, \dots, n - 1$  oraz  $x_n \leq a$  lub  $x_n \geq b$ ,  
 a  $\gamma_r = (x_0, x_1, x_2, \dots, x_r)$ ,  $r \leq n$  – początkowym odcinkiem tej trajektorii.
- Definiujemy zmienną losową  $S(x)$ :

$$S(x) = \sum_{r=1}^n V(\gamma_{r-1}) f(x_{r-1}),$$

gdzie

$$V(\gamma_0) = 1,$$

$$V(\gamma_r) = \frac{K(x_{r-1}, x_r)}{\rho(x_r - x_{r-1})} V(\gamma_{r-1}).$$

- Można dowieść, że wartość oczekiwana  $E[S(x)]$ , traktowana jako funkcja zmiennej  $x$ , spełnia równanie całkowe (1).

► Definiujemy inną zmienną losową:

$$c_r(x) = \begin{cases} \frac{V(\gamma_{n-r}) f(x_{n-r})}{\rho_r(x_{n-r})}, & r \leq n, \\ 0 & r > n, \end{cases}$$

gdzie  $\rho_r(x)$  określone wzorem:

$$\rho_1(x) = \int_{-\infty}^{a-x} \rho(y) dy + \int_{b-x}^{+\infty} \rho(y) dy,$$

$$\rho_r(x) = \int_a^b \dots \int_a^b \rho(x_1 - x) \rho(x_2 - x_1) \dots \rho(x_{r-1} - x_{r-2}) \\ \times \rho_1(x_{r-1}) dx_1 dx_2 \dots dx_{r-1} \quad \text{dla } r > 1,$$

jest prawdopodobieństwem, że cząsteczka, która w pewnej chwili jest w punkcie  $x$ , przeżyje jeszcze dokładnie  $r$  chwil.

► Można dowieść, że wartość oczekiwana  $E[c_r(x)]$ , traktowana jako funkcja zmiennej  $x$ , spełnia równanie całkowe (1).

▷ Dowody oraz szczegóły można znaleźć w pracy: E. S. Page, „*The Monte Carlo solution of some integral equations*”, Proc. Camb. Phil. Soc. **50** (1954) 414–425.



## Przykładowe rozwiązanie równań całkowych (2) i (3) dla 500 trajektorii

| Przedział       | Wielkość szacowana | Rozkład $\rho(x)$ | Rozwiązanie |                   |                   |
|-----------------|--------------------|-------------------|-------------|-------------------|-------------------|
|                 |                    |                   | dokładne    | $S(x)$            | $c_1(x)$          |
| $a = 0, b = 1$  | $\tau(0.5)$        | $N(0, 1)$         | 1.606       | $1.578 \pm 0.082$ | $1.608 \pm 0.002$ |
|                 |                    | $N_{[a,b]}(0, 1)$ | 1.606       | $1.612 \pm 0.056$ | $1.648 \pm 0.050$ |
|                 | $p(0.5)$           | $N(0, 1)$         | 0.500       | $0.492 \pm 0.028$ | $0.499 \pm 0.008$ |
|                 |                    | $N_{[a,b]}(0, 1)$ | 0.500       | $0.500 \pm 0.018$ | $0.499 \pm 0.020$ |
| $a = 0, b = 10$ | $\tau(2.5)$        | $N(0, 1)$         | 25.17       | $23.44 \pm 2.00$  | $15.69 \pm 6.36$  |
|                 | $p(2.5)$           | $N(0, 1)$         | 0.724       | $0.756 \pm 0.040$ | $0.727 \pm 0.060$ |

$N_{[a,b]}(0, 1)$  – oznacza standardowy rozkład normalny ucięty do przedziału  $[a, b]$ .

⇒ **Ćw. N5\***: Wykonać powyższe obliczenia dla większej liczby trajektorii.

▷ **Uwaga:**

Powyższe metody pozwalają szacować rozwiązania równań całkowych w pojedynczych punktach.

## Metoda H. Kschwendta:

- ▷ Daje oszacowanie rozwiązania równania (1) w całym przedziale  $(a, b)$ .
- ▷ Dopuszcza przypadek gdy  $f$  i  $K$  są funkcjami o wartościach zespolonych.

Niech  $|f(x)|$  oraz  $|K(x, y)|$  – odpowiednio moduły liczb  $f(x)$  i  $K(x, y)$ .

Definiujemy funkcje  $W_0(x)$  oraz  $C(x, y)$ :

$$f(x) = W_0(x) |f(x)|, \quad K(x, y) = C(x, y) |K(x, y)|.$$

Niech

$$S(y) = \int_a^b |K(x, y)| dx.$$

► Badamy błędzenie przypadkowe cząsteczki  $X$  według następującego schematu:

- Cząsteczka  $X$  „rodzi się” w chwili  $t = 0$  w punkcie  $x \in (a, b)$  wybranym losowo według rozkładu prawdopodobieństwa

$$q(x) = \frac{|f(x)|}{\int_a^b |f(x)| dx}.$$

„Urodzona” w punkcie  $x$  cząsteczka otrzymuje wagę  $W_0(x)$ .

- Błędzenie cząsteczki odbywa się w dyskretnych chwilach czasu według następujących zasad: niech w chwili  $t = n - 1$  cząsteczka znajduje się w punkcie  $y$  i ma wagę  $W_{n-1}(y)$ .

1. Jeżeli  $S(y) < 1$ , to z prawdopodobieństwem  $1 - S(y)$  cząsteczka ulega anihilacji lub z prawdopodobieństwem  $S(y)$  przechodzi do punktu  $x$  wylosowanego według rozkładu o gęstości

$$\kappa(x) = \frac{|K(x, y)|}{S(y)}$$

i otrzymuje wagę:

$$W_n(x) = C(x, y) W_{n-1}(y).$$

2. Jeżeli  $S(y) \geq 1$ , to cząsteczka zostaje zastąpiona przez  $S(y)$  cząsteczek, z których każda otrzymuje wagę cząsteczki macierzystej.

Jeżeli  $S(y)$  nie jest liczbą całkowitą, to nowa liczba cząsteczek jest równa  $\lfloor S(y) \rfloor$  z prawdopodobieństwem  $1 - \{S(y) - \lfloor S(y) \rfloor\}$  lub  $\lfloor S(y) \rfloor + 1$  z prawdopodobieństwem  $S(y) - \lfloor S(y) \rfloor$  (gdzie  $\lfloor a \rfloor$  oznacza część całkowitą liczby  $a$ ).

Każda „nowonarodzona” cząsteczka wykonuje błędzenie przypadkowe według opisanego schematu w sposób niezależny od pozostałych cząsteczek.

- Definiujemy zmienną losową  $\xi(x)$ ,  $a \leq x \leq b$  jako sumę wag wszystkich cząsteczek, które kiedykolwiek przebywały w punkcie  $x$ , przy czym waga danej cząsteczki występuje w tej sumie tyle razy ile razy ta cząsteczka przechodziła przez punkt  $x$ .

► Można udowodnić, że wartość oczekiwana zmiennej losowej  $\xi(x)$  jest równa wartości rozwiązania równania całkowego (1) w punkcie  $x$ .

▷ W praktyce zamiast funkcji  $\phi$  szacuje się funkcję schodkową, przyjmującą na przedziale  $(x, x + dx)$  wartość:

$$\Phi(x) = \int_x^{x+dx} \phi(y) dy.$$

## Schemat obliczeń:

1. Przedział  $(a, b)$  dzielimy na  $s$  podprzedziałów  $(x_\nu, x_\nu + \Delta x_\nu)$ ,  $\nu = 1, 2, \dots, s$ .  
Wprowadzamy zmienne pomocnicze  $M_\nu$ , przyjmując początkowo  $M_\nu = 0$ ,  $\nu = 1, 2, \dots, s$ .
2. Losujemy punkt  $x$  „narodzin” cząsteczki  $X$  według rozkładu  $q(x)$  i przypisujemy jej wagę  $W = W_0(x)$ .
3. Znajdujemy takie  $\nu$ , że  $x_\nu \leq x < x_\nu + \Delta x_\nu$ , zwiększamy wartość  $M_\nu$  o  $W$ , kładziemy  $y = x$  i obliczamy  $S(y)$ .

4. Jeżeli  $S(y) < 1$ , to przechodzimy do kroku 5, w przeciwnym razie przechodzimy do kroku 6.
5. Losujemy liczbę  $R \in \mathcal{U}(0, 1)$ .  
 Jeżeli  $R \leq S(y)$ , to cząsteczka przechodzi do nowego punktu – dalsze obliczenia wykonujemy od kroku 9.  
 Jeżeli  $R > S(y)$ , to cząsteczka ulega **anihilacji** – dalsze obliczenia wykonujemy od kroku 7.
6. Obliczamy liczbę nowych cząsteczek. Zapamiętujemy „miejsce urodzenia”  $y$  i wagę  $W$  tych nowych cząsteczek. Dalsze obliczenia dla każdej cząsteczki wykonujemy od kroku 9.
7. Jeżeli historie wszystkich cząsteczek „urodzonych” przez cząsteczkę wygenerowaną w kroku 2 zostały już doprowadzone do końca, to przechodzimy do kroku 10, w przeciwnym razie przechodzimy do kroku 8.
8. Rozpoczynamy obserwację historii cząsteczki „urodzonej” w kroku 6.
9. Losujemy nowe położenie cząsteczki według rozkładu  $\kappa(x)$  i obliczamy jej nową wagę  $W$  mnożąc dotychczasową wagę przez  $C(x, y)$ . Dalsze obliczenia wykonujemy od kroku 3.
10. Powtarzamy  $N$  razy obliczenia od kroku 2. Estymatorami całek  $\Phi(x)$  są wartości:

$$\hat{\Phi}_\nu = \frac{M_\nu}{N} \int_a^b |f(x)| dx .$$

Przykładowe rozwiązanie równania całkowego:

$$\phi(x) = x + 0.15 \int_0^2 \ln(xy^2) \phi(y) dy \text{ dla } 20\,000 \text{ trajektorii}$$

| Przedział  | Rozwiązanie |          | Przedział  | Rozwiązanie |          |
|------------|-------------|----------|------------|-------------|----------|
|            | Monte Carlo | dokładne |            | Monte Carlo | dokładne |
| (0.0, 0.1) | -0.87       | -0.83    | (1.0, 1.1) | 1.37        | 1.36     |
| (0.1, 0.2) | -0.23       | -0.24    | (1.1, 1.2) | 1.48        | 1.49     |
| (0.2, 0.3) | 0.03        | 0.05     | (1.2, 1.3) | 1.65        | 1.62     |
| (0.3, 0.4) | 0.35        | 0.27     | (1.3, 1.4) | 1.82        | 1.75     |
| (0.4, 0.5) | 0.44        | 0.46     | (1.4, 1.5) | 1.95        | 1.88     |
| (0.5, 0.6) | 0.61        | 0.63     | (1.5, 1.6) | 1.98        | 2.00     |
| (0.6, 0.7) | 0.79        | 0.79     | (1.6, 1.7) | 2.09        | 2.12     |
| (0.7, 0.8) | 0.97        | 0.94     | (1.7, 1.8) | 2.24        | 2.24     |
| (0.8, 0.9) | 1.05        | 1.09     | (1.8, 1.9) | 2.42        | 2.36     |
| (0.9, 1.0) | 1.22        | 1.23     | (1.9, 2.0) | 2.52        | 2.48     |

- ▶ **Ogólny przypadek liniowego równania całkowego można przy pomocy formuł kwadraturowych sprowadzić do zadania rozwiązywania układu równań liniowych – można wówczas stosować wszystkie metody przedstawione w wykładzie 8.**

- Zagadnienie obliczania wartości własnych i wektorów własnych macierzy  $\mathbf{H}$  rzędu  $n$ :

$$\mathbf{H} \vec{x} = \lambda \vec{x}.$$

Dla uproszczenia założymy, że największa wartość własna jest pojedyncza, rzeczywista i dodatnia.

- ▷ Metody numeryczne  $\rightarrow$  iteracyjna procedura wyznaczania największej wartości własnej:

- Ustalamy wektor początkowy  $\vec{x}_0$  – może być wylosowany według jakiegoś rozkładu ciągłego.
- Jeżeli skonstruowaliśmy już wektory  $\vec{x}_1, \vec{x}_2, \dots, \vec{x}_{m-1}$ , to wektor  $\vec{x}_m$  obliczamy ze wzoru:

$$\vec{x}_m = \mathbf{H} \vec{x}_{m-1} / \lambda_m,$$

gdzie  $\lambda_m$  jest dobrana tak, żeby

$$\sum_{j=1}^n |(\vec{x}_m)_j| = 1,$$

gdzie  $(\vec{x})_j$  oznacza  $j$ -tą składową wektora  $\vec{x}$ ,  $j = 1, 2, \dots, n$ .

- Ciąg  $\lambda_m$ ,  $m = 1, 2, \dots$ , jest zbieżny do największej wartości własnej macierzy  $\mathbf{H}$ , natomiast ciąg wektorów  $\vec{x}_m$  jest zbieżny do wektora własnego odpowiadającego tej wartości własnej.



▷ Na podstawie powyższych wzorów otrzymujemy:

$$\lambda_1 \lambda_2 \dots \lambda_m (\vec{x}_m)_j = (\mathbf{H}^m \vec{x}_0)_j ; \quad \lambda_1 \lambda_2 \dots \lambda_m = \sum_{j=1}^n (\mathbf{H}^m \vec{x}_0)_j .$$

► Dla dostatecznie dużych  $k$  oraz  $m > k$  mamy:

$$\frac{\sum_{j=1}^n (\mathbf{H}^m \vec{x}_0)_j}{\sum_{j=1}^n (\mathbf{H}^k \vec{x}_0)_j} = \lambda_{k+1} \lambda_{k+2} \dots \lambda_m \approx \lambda^{m-k} ,$$

skąd

$$\lambda \approx \left[ \frac{\sum_{j=1}^n (\mathbf{H}^m \vec{x}_0)_j}{\sum_{j=1}^n (\mathbf{H}^k \vec{x}_0)_j} \right]^{\frac{1}{m-k}} .$$

► Oszacowaniem wektora własnego odpowiadającego tej wartości własnej jest  $\mathbf{H}^m \vec{x}_0$  dla dostatecznie dużego  $m$ .

Zatem zagadnienie obliczania wartości i wektorów własnych można sprowadzić do zagadnienia szacowania składowych wektora  $\mathbf{H}^m \vec{x}_0$  dla dostatecznie dużych  $m$  przy losowym wyborze wektora początkowego  $\vec{x}_0$ .

**Model probabilistyczny:**

Niech  $\mathbf{Q} = (q_{ij})$ ,  $i, j = 1, 2, \dots, n$  – macierz probabilistyczna:

$$q_{ij} \geq 0, \quad \sum_{j=1}^n q_{ij} = 1.$$

► Konstruujemy błądzenie przypadkowe cząsteczki  $X$  po zbiorze indeksów  $\{1, 2, \dots, n\}$  według następującego schematu:

- W chwili  $t = 0$  cząsteczka  $X$  znajduje się w stanie  $i_0$  wybranym losowo ze zbioru stanów  $\{1, 2, \dots, n\}$  według ustalonego prawdopodobieństwa  $p_j$  ( $j = 1, 2, \dots, n$ ).
- Jeżeli w pewnej chwili  $t = n - 1$  cząsteczka jest w stanie  $i_{n-1}$ , to w następnej chwili znajdzie się w stanie  $i_n$  wylosowanym według rozkładu  $q_{i_{n-1},j}$  ( $j = 1, 2, \dots, n$ ), wyznaczonego przez  $i_{n-1}$ -szy wiersz macierzy  $\mathbf{Q}$ .
- Niech  $\gamma = (i_0, i_1, i_2, \dots)$  – trajektoria cząsteczki  $X$ . Definiujemy zmienną losową odpowiadającą początkowym odcinkom  $\gamma_r = (i_0, i_1, \dots, i_r)$  tej trajektorii:

$$W_r(\gamma) = \frac{(\vec{x})_{i_0}}{p_{i_0}} \frac{h_{i_1 i_0} h_{i_2 i_1} \dots h_{i_r i_{r-1}}}{q_{i_0 i_1} q_{i_1 i_2} \dots q_{i_{r-1} i_r}}.$$

▷ Podobnie jak dla układów równań liniowych można udowodnić, że

$$E[W_m(\gamma)\delta_{i_m j}] = (\mathbf{H}^m \vec{x}_0)_j$$

oraz, że

$$E[W_m(\gamma)] = \sum_{j=1}^n E[W_m(\gamma)\delta_{i_m j}] = \lambda_1 \lambda_2 \dots \lambda_m .$$

▷ Dla dostatecznie dużych  $k$  oraz  $m > k$  otrzymujemy:

$$\frac{E[W_m(\gamma)]}{E[W_k(\gamma)]} \approx \lambda^{m-k}$$

► Za estymator wartości własnej  $\lambda$  możemy przyjąć:

$$\hat{\lambda} = \left[ \frac{W_m(\gamma)}{W_k(\gamma)} \right]^{\frac{1}{m-k}} .$$

**Uwaga:** Ponieważ wartość oczekiwana ilorazu zmiennych losowych nie jest równa ilorazowi wartości tych zmiennych, to powyższy estymator jest estymatorem obciążonym.

- **Funkcja jednej zmiennej:**

Niech  $f(x_1) = f_1$ ,  $f(x_2) = f_2$  – znane wartości.

▷ **Zadanie:** Obliczyć  $f(p)$  dla  $x_1 < p < x_2$ .

▶ Stosując metodę interpolacji liniowej otrzymujemy:

$$f(p) = \frac{p - x_1}{x_2 - x_1} f_2 + \frac{x_2 - p}{x_2 - x_1} f_1.$$

Dla uproszczenia rozważań przyjmiemy:  $x_1 = 0$ ,  $x_2 = 1 \rightarrow$  wówczas:

$$f(p) = (1 - p) f_1 + p f_2.$$

- **Funkcja dwóch zmiennych:**

Analogicznie otrzymujemy

$$f(p_1, p_2) = \sum_{\{\delta\}} r_1 r_2 f(\delta_1, \delta_2),$$

gdzie

$$r_i = \begin{cases} 1 - p_i, & \delta_i = 0, \\ p_i, & \delta_i = 1, \end{cases}$$

a sumowanie przebiega po wszystkich parach  $(\delta_1, \delta_2)$  (których jest cztery).

- **Funkcja  $n$  zmiennych:**

Formuła interpolacyjna ma postać:

$$f(p_1, p_2, \dots, p_n) = \sum_{\{\delta\}} r_1 r_2 \dots r_n f(\delta_1, \delta_2, \dots, \delta_n),$$

gdzie sumowanie przebiega po wszystkich układach liczb  $(\delta_1, \delta_2, \dots, \delta_n)$ , w których  $\delta_i = 0$  lub 1.

Powyższa suma ma  $2^n$  składników, z których każdy jest iloczynem  $(n + 1)$  czynników. Dla dużych  $n$  obliczanie staje się bardzo pracochłonne; dodatkowo, kumulacja błędów zaokrągleń może prowadzić do niepewnych wyników! → Np. dla  $n = 50$  liczba składników jest rzędu  $10^{14}$ !

► Czy nie można oszacować  $f(p_1, p_2, \dots, p_n)$  na podstawie mniejszej liczby składników wybranych w pewien losowy sposób?

▷ Z definicji wielkości  $r_i$  mamy:

$$0 \leq r_1 r_2 \dots r_n \leq 1, \quad \sum_{\{r\}} r_1 r_2 \dots r_n = 1,$$

gdzie sumowanie przebiega po wszystkich takich układach liczb  $r_1, r_2, \dots, r_n$ , w których  $r_i = p_i$  lub  $r_i = 1 - p_i$  dla wszystkich  $i = 1, 2, \dots, n$ .

⇒  $r_1 r_2 \dots r_n$  mogą być traktowane jako prawdopodobieństwa w pewnym rozkładzie.

## Metoda Monte Carlo

- Definiujemy zmienną losową  $\xi = (\xi_1, \xi_2, \dots, \xi_n)$  o niezależnych składowych  $\xi_i$  takich, że:

$$\mathcal{P}\{\xi_i = 0\} = 1 - p_i, \quad \mathcal{P}\{\xi_i = 1\} = p_i.$$

- Wartość funkcji we wzorze interpolacyjnym jest wartością oczekiwaną zmiennej losowej

$f(\xi_1, \xi_2, \dots, \xi_n)$ :

$$f(p_1, p_2, \dots, p_n) = E[f(\xi_1, \xi_2, \dots, \xi_n)].$$

$\Rightarrow f(\xi_1, \xi_2, \dots, \xi_n)$  jest estymatorem nieobciążonym szukanej wartości  $f(p_1, p_2, \dots, p_n)$ .

- Losujemy  $N$  punktów  $(\xi_1^{(i)}, \xi_2^{(i)}, \dots, \xi_n^{(i)})$ ,  $i = 1, 2, \dots, N$ , i obliczamy  $f(\xi_1^{(i)}, \xi_2^{(i)}, \dots, \xi_n^{(i)})$  w każdym z tych punktów.

- Oszacowaniem wartości funkcji  $f(p_1, p_2, \dots, p_n)$  jest średnia arytmetyczna:

$$\bar{f} = \frac{1}{N} \sum_{i=1}^N f(\xi_1^{(i)}, \xi_2^{(i)}, \dots, \xi_n^{(i)}).$$

- Można pokazać, że odchylenie standardowe tego oszacowania jest ograniczone z góry przez:

$$\sigma(f) \equiv \frac{1}{\sqrt{N}} \sigma \left( f(\xi_1^{(i)}, \xi_2^{(i)}, \dots, \xi_n^{(i)}) \right) < \sqrt{\frac{M}{2} \frac{\frac{1}{2} + \lg n}{N}} \quad (\text{gdzie } M = \text{const}).$$
